# Supplementary material for: Assessing Risk for Relapse among Children with Infantile Spasms Using the Based Score after ACTH Treatment: A Retrospective Study
Source: Springer Nature journal article supplement (doi:10.1007/s40120-022-00347-7), 2022-04-15

## **Assessing Risk for Relapse Among Children with Infantile Spasms Using the Based Score After ACTH treatment: A Retrospective Study**

**Authors:** Lin Wan<sup>1,2,3,†</sup>, Yan-Qin Lei<sup>4,†</sup>, Xin-Ting Liu<sup>1,2,3†</sup>, Jian Chen<sup>1,2</sup>, Chien-Hung Yeh<sup>5</sup>, Chu-Ting Zhang<sup>5</sup>, Xiao-An Wang<sup>4</sup>, Xiu-Yu Shi<sup>1,2,6</sup>, Jing Wang<sup>1,2</sup>, Bo Zhang<sup>7</sup>, Li-Ping Zou<sup>1,2,3,6</sup>, Guang Yang<sup>1,2,3,6,\*</sup>

### **Affiliations:**

<sup>1</sup>Senior Department of Pediatrics, the Seventh Medical Center of PLA General Hospital, Beijing, China

<sup>2</sup>Department of Pediatrics, the First Medical Center, Chinese PLA General Hospital, Beijing, China

<sup>3</sup>Medical School of Chinese People's Liberation Army, Beijing, China

<sup>4</sup>Brainup institute of Science and Technology, Chongqing, China

<sup>5</sup>Beijing Institute of Technology, Beijing, China

<sup>6</sup>The Second School of Clinical Medicine, Southern Medical University, Guangzhou, China

<sup>7</sup>Department of Neurology and ICCTR Biostatistics and Research Design Center, Boston Children's Hospital, Harvard Medical School, Boston, MA, USA

† These Authors contributed equally to the research article.

### **Corresponding author:**

Dr. Guang Yang, Senior Department of Pediatrics, the Seventh Medical Center of PLA General Hospital, Beijing 100000, China; Email:

[yangg301@126.com](mailto:yangg301@126.com)

## Supplementary Materials

The supplementary materials include the following figures and tables: Figure S1, ...

**Table S1.** Cox regression analysis of relapse risk factors in children with infantile spasms (72 cases) who achieved short-term response.

Model 1: Univariate cox regression analysis.

|                                                      | HR   | 95% Confidence interval<br>for hazard ratio |       | P                |
|------------------------------------------------------|------|---------------------------------------------|-------|------------------|
|                                                      |      | Lower                                       | Upper |                  |
| Gender (Male/Female)                                 | 0.73 | 0.37                                        | 1.46  | 0.38             |
| Presence of hypsarrhythmia before ACTH treatment     | 0.54 | 0.26                                        | 1.15  | 0.11             |
| Pathogenic structural abnormalities on MRI           | 0.85 | 0.39                                        | 1.85  | 0.68             |
| Definitive etiology                                  | 1.5  | 0.78                                        | 2.86  | 0.22             |
| Number of ASMs                                       | 1.47 | 0.93                                        | 2.31  | 0.098            |
| VPA exposure history                                 | 2.18 | 1.14                                        | 4.17  | <b>0.018</b>     |
| TPM exposure history                                 | 0.84 | 0.3                                         | 2.38  | 0.75             |
| VGB exposure history                                 | 0.46 | 0.06                                        | 3.33  | 0.44             |
| Hormonal therapy history                             | 1.09 | 0.43                                        | 2.81  | 0.85             |
| Presence of hypsarrhythmia after ACTH treatment      | 3.09 | 1.27                                        | 7.53  | <b>0.013</b>     |
| Interval from onset to receive ACTH treatment        | 1.1  | 1.01                                        | 1.2   | <b>0.026</b>     |
| Age at spasms onset                                  | 0.39 | 0.99                                        | 1     | 1.04             |
| Frequency of spasms                                  | 1    | 0.99                                        | 1     | 0.39             |
| Dosage of ACTH                                       | 0.76 | 0.35                                        | 1.68  | 0.5              |
| BASED score                                          | 1.54 | 1.27                                        | 1.88  | <b>&lt;0.001</b> |
| <b>Model 2: Multivariate cox regression analysis</b> |      |                                             |       |                  |
| Presence of hypsarrhythmia after ACTH treatment      | 2.09 | 0.76                                        | 5.73  | 0.2              |
| VPA exposure history                                 | 1.85 | 0.87                                        | 3.94  | 0.11             |
| Interval from onset to receive ACTH treatment        | 0.97 | 0.87                                        | 1.09  | 0.7              |
| Presence of hypsarrhythmia before ACTH treatment     | 0.66 | 0.25                                        | 1.71  | 0.4              |
| Number of ASMs                                       | 1.41 | 0.84                                        | 2.38  | 0.2              |
| BASED score                                          | 1.5  | 1.2                                         | 1.87  | <b>&lt;0.001</b> |

Note: Bold P value is statistically significant; data are expressed as number, mean standard deviation, or median (range).

Abbreviations: ACTH, Adrenocorticotrophic Hormone; ASM, anti-seizure medication; BASED, Burden of AmplitudeS and Epileptiform Discharges; TPM, topiramate; VGB, vigabatrin; VPA, valproate.

**Figure S1. Flow chart of screening of the subjects.**

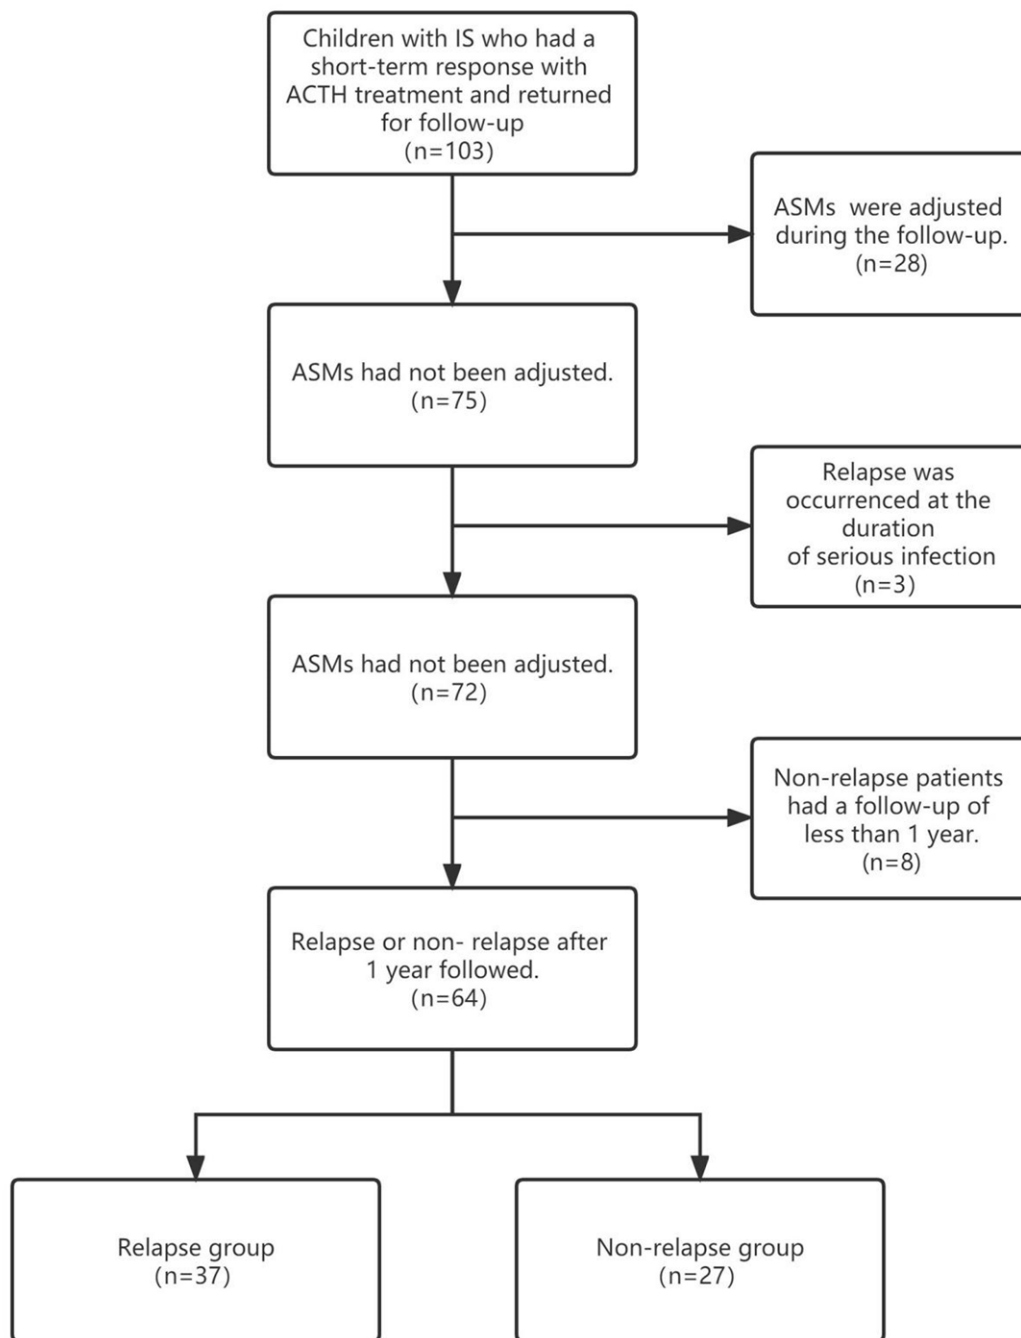

Abbreviations: ASMs, anti-seizure medicines; IS, infantile spasms; ACTH, Adrenocorticotrophic hormone

**Figure S2.** Multivariate Cox regression analysis of relapse risk factors in children with infantile spasms (64 cases) who achieve a short-term response.

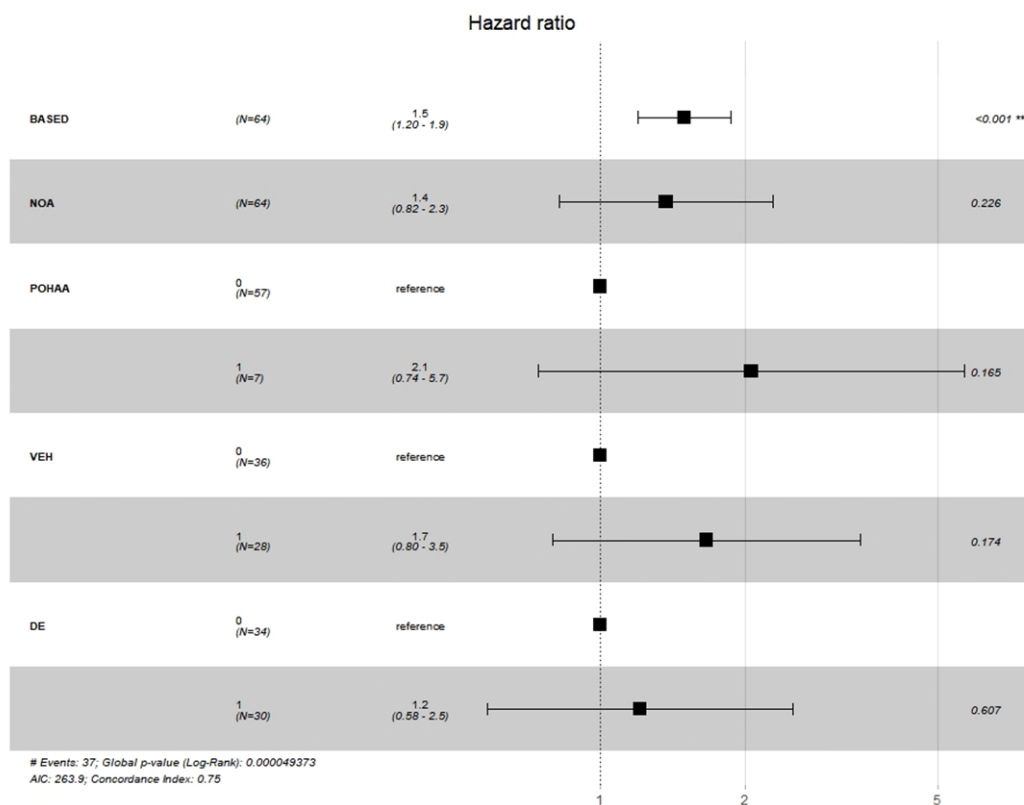

Abbreviations: DE, Definitive etiology; NOA, Number of anti-seizure medication; POHAA, Presence of hypsarrhythmia after ACTH; VEH, VPA exposure history=VEH

**Figure S3.** Multivariate Cox regression analysis of relapse risk factors in children with infantile spasms(72 cases) who achieve a short-term response.

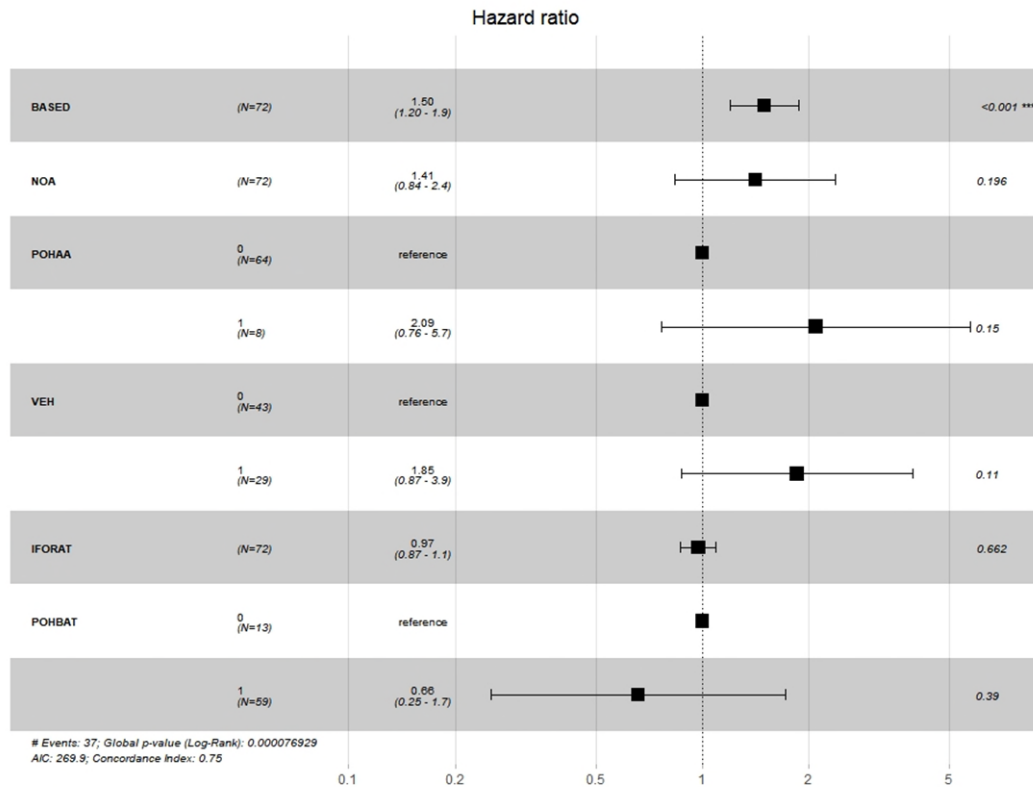

Abbreviations: IFORAT, Interval from onset to receive ACTH treatment; NOA, Number of anti-seizure medication; POHAA, Presence of hypsarrhythmia after ACTH; VEH, VPA exposure history=VEH; POHBA, Presence of hypsarrhythmia before ACTH

**Figure S4.** Kaplan–Meier (KM) survival curves for the patients with a short-term response after ACTH treatment (n=72).

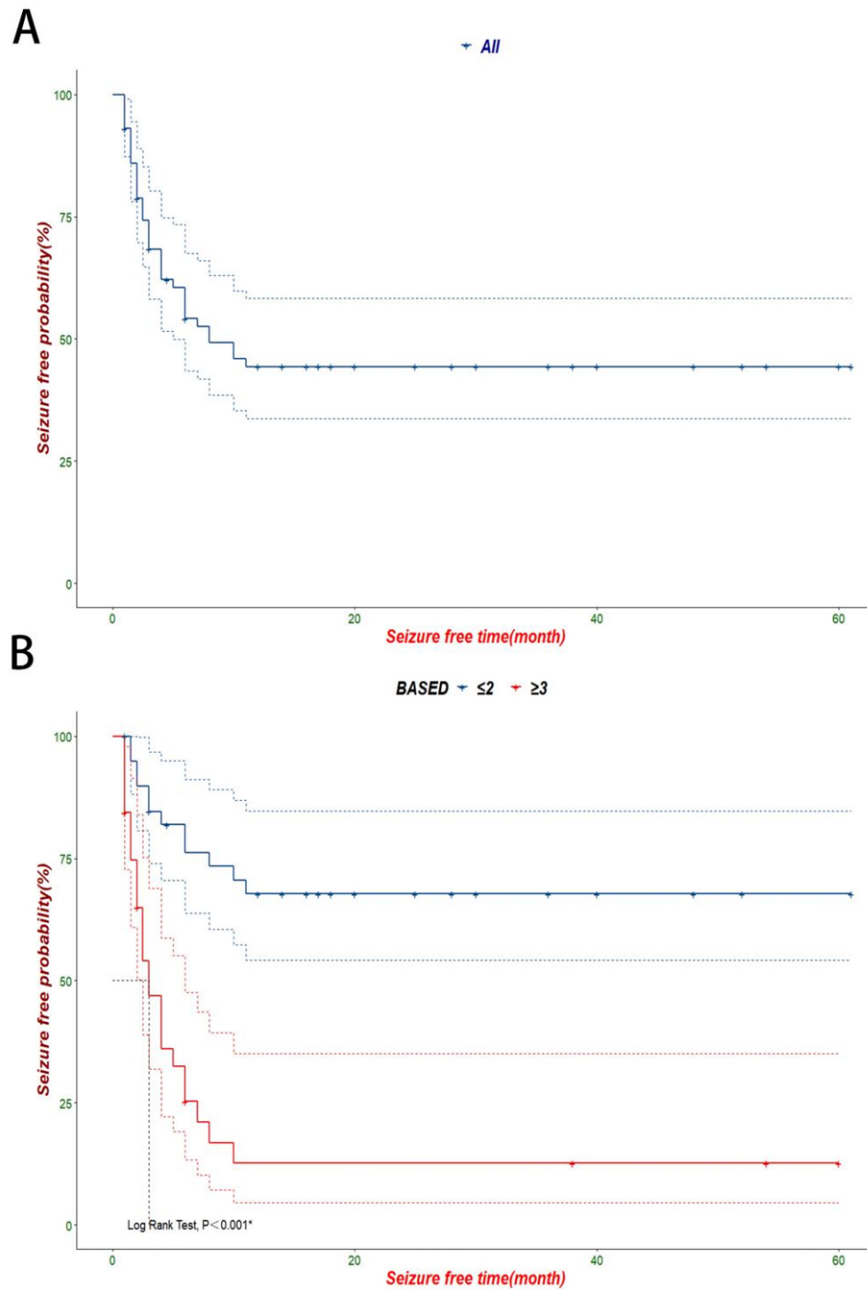

- A. Survival curves for the patents with short-term response after ACTH treatment.
- B. b.Survival curves with a cutoff value of BASED score ( $\geq 3$  or  $\leq 2$ )for the patents with shorterm-response after ACTH treatment.

**Figure S5.** Pipeline of the EEG-based functional connectivity states analysis

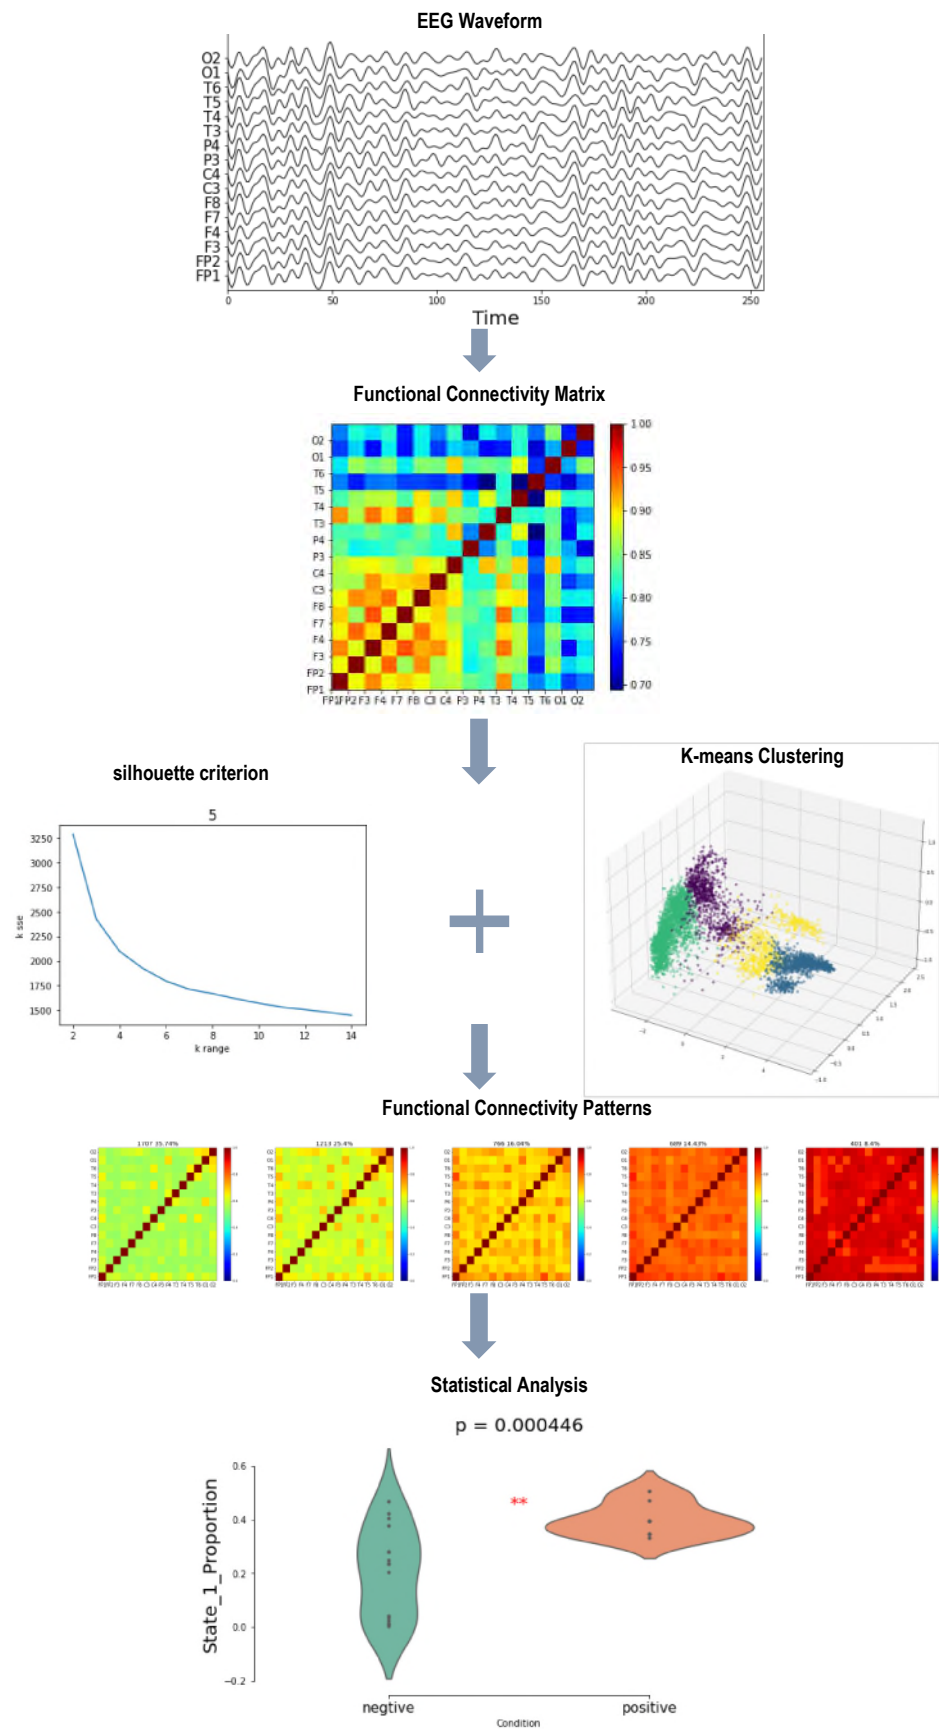

Supplement: MOESM1 [file 20315444]
